# Supplementary material
Source: MDPI journal article supplement (https://www.mdpi.com/1420-3049/24/12/2209)
Supplement: s1 [file s1]

Archive with 2 entries (2 files):
- molecules-521966-SI.pdf
- SUPP MAT - datatables.xlsx
