# Supplementary material for: A Method of Calculating the Kamlet–Abboud–Taft Solvatochromic Parameters Using COSMO-RS
Source: MDPI journal article supplement (doi:10.3390/molecules24122209), 2019-06-13
Supplement: s1 [file s1 › SUPP MAT - datatables.xlsx]

## Sheet: Contents
Supplementary Material
A method of calculating the Kamlet-Abboud-Taft solvatochromic parameters using COSMO-RS
This supplementary spreadsheet contains the full list of experimental and calculated KAT parameters, data for 16 additional case studies, and attempts to directly predict equilibrium constants in COSMOtherm.

## Sheet: KAT parameters
	Experimental	Normalised virtual ln(KT)	Uncorrected estimations	σ-moment	π* correction		Corrected estimations	Experimental	Normalised virtual ln(KT)	Uncorrected estimations	σ-moment	β correction		Corrected estimations	Experimental	Uncorrected estimations	Corrected estimations
Solvent	π*	Methyl acetoacetate	π*	Area	Coefficient (surface area)	Constant	π*	β	Dimedone	β	sig3	Coefficient (sig3)	Constant	β	α	α	α
Primary data set
Carboxylic acids					(unreliable virtual equilibrium)							-0.0021	0.1048
Formic acid	0.65	-0.73	1.76	72.3103			-	0.38	0.74	0.53	-21.1389			0.38	1.23	1.13	1.13
Acetic acid	0.64	-0.16	1.16	92.6375			-	0.45	0.8	0.56	-2.5161			0.45	1.12	1.34	1.34
Propanoic acid	0.58	-0.03	1.03	111.269			-	0.45	0.8	0.56	-1.8196			0.45	1.12	1.25	1.25
Butanoic acid	0.56	0.06	0.93	131.321			-	0.45	0.8	0.56	-1.4745			0.45	1.1	1.22	1.22
Pentanoic acid	0.54	0.12	0.87	151.096			-	0.45	0.79	0.56	-1.2953			0.45	1.19	1.19	1.19
Hexanoic acid	0.52	0.18	0.81	169.277			-	0.45	0.79	0.56	-0.942			0.45	1.22	1.19	1.19
Heptanoic acid	0.5	0.22	0.77	191.078			-	0.45	0.78	0.55	-0.9596			0.44	1.2	1.21	1.21
Polar alcohols					-0.0043	0.5375						-0.0026	0.0543
Methanol	0.6	0.19	0.8	67.6578			0.55	0.66	1.02	0.69	21.8696			0.69	0.98	0.84	0.84
Ethanol	0.54	0.32	0.66	88.1933			0.5	0.75	1	0.67	23.2786			0.68	0.86	0.68	0.68
n-Propanol	0.52	0.39	0.59	108.361			0.51	0.9	0.96	0.65	22.1737			-	0.84	0.71	0.71
i-Propanol	0.48	0.4	0.57	107.43			0.5	0.84	0.97	0.66	24.7211			-	0.76	0.61	0.61
Benzyl alcohol	0.98	0.19	0.8	150.941			0.91	0.52	0.75	0.53	11.6757			0.51	0.6	0.73	0.73
2-Phenylethanol	0.88	0.27	0.71	169.821			0.91	0.61	0.77	0.55	15.3449			0.53	0.64	0.81	0.81
3-Phenylpropanol	0.95	0.31	0.67	189.733			0.95	0.55	0.78	0.55	20.3415			0.55	0.53	0.72	0.72
Allyl alcohol	0.52	0.17	0.82	103.343			0.72	0.9	0.85	0.59	16.0822			-	0.84	0.8	0.8
Ethanediol	0.92	0	1	97.5291			0.88	0.52	0.93	0.64	30.7932			0.66	0.9	0.91	0.91
Glycerol	1.04	-0.05	1.05	121.649			1.03	0.67	0.86	0.59	38.4805			0.64	0.93	0.98	0.98
Phenol	0.72	-0.51	1.54	131.305			-	0.3	0.56	0.43	-23.038			0.31	1.65	1.35	1.35
m-Cresol	0.68	-0.37	1.39	150.106			-	0.34	0.57	0.43	-19.6488			0.33	1.13	1.45	1.45
p-Cresol	0.68	-0.34	1.35	150.609			-	0.34	0.58	0.44	-19.2816			0.33	1.64	1.33	1.33
m-Chlorophenol	0.77	-0.69	1.72	150.553			-	0.23	0.52	0.4	-36.3272			0.26	1.57	1.66	1.66
Lipophilic alcohols					-0.0016	0.297						(basic functionality)
n-Butanol	0.47	0.45	0.52	128.294			0.43	0.84	0.94	0.64	22.3224			-	0.84	0.66	0.66
i-Butanol	0.4	0.43	0.55	125.135			0.45	0.84	0.91	0.62	18.3605			-	0.79	0.6	0.6
s-Butanol	0.4	0.46	0.51	125.728			0.42	0.8	0.93	0.63	22.5669			-	0.69	0.47	0.47
t-Butanol	0.41	0.46	0.52	123.555			0.42	0.93	0.95	0.65	24.8471			-	0.42	0.42	0.42
n-Pentanol	0.4	0.49	0.48	147.959			0.42	0.86	0.92	0.63	22.4258			-	0.84	0.69	0.69
i-Pentanol	0.4	0.47	0.5	144.128			0.44	0.86	0.92	0.63	22.3582			-	0.84	0.66	0.66
t-Pentanol	0.4	0.51	0.46	138.994			0.39	0.93	0.91	0.62	27.7485			-	0.28	0.33	0.33
n-Hexanol	0.4	0.52	0.45	168.108			0.42	0.84	0.91	0.62	22.5483			-	0.8	0.68	0.68
Cyclohexanol	0.45	0.5	0.47	142.498			0.4	0.84	0.93	0.64	24.8454			-	0.66	0.56	0.56
n-Octanol	0.4	0.58	0.39	207.725			0.43	0.81	0.89	0.61	22.5375			-	0.77	0.66	0.66
n-Decanol	0.45	0.62	0.35	247.445			0.45	0.82	0.87	0.6	22.7904			-	0.7	0.68	0.68
Alkanes					-0.0007	0.0854						0.0095	0.0045
2-Methylbutane	-0.08	1	-0.05	133.177			-0.05	0.01	-0.18	0.01	0.2519			0	0	0.03	0
n-Pentane	-0.08	1.01	-0.06	137.223			-0.05	0	-0.18	0.01	0.2963			0	0	0.03	0
n-Hexane	-0.04	1	-0.05	156.878			-0.03	0	-0.18	0.01	0.4014			0	0	0.03	0
n-Heptane	-0.08	1	-0.05	176.91			-0.01	0	-0.18	0.01	0.479			0	0	0.03	0
n-Octane	0.01	1	-0.05	196.909			0	0	-0.18	0.01	0.5477			0	0	0.03	0
n-Decane	0.03	0.99	-0.04	236.677			0.04	0	-0.18	0.01	0.7184			0	0	0.03	0
n-Dodecane	0.05	0.99	-0.04	276.456			0.07	0	-0.18	0.01	0.8024			0	0	0.03	0
Cyclohexane	0	1	-0.05	131.17			-0.04	0	-0.18	0.01	0.3244			0	0	0.03	0
cis-Decalin	0.11	0.98	-0.03	184.02			0.01	0.08	-0.18	0.01	0.4575			0	0	0.03	0
Amides					-0.0027	0.1886						-0.0043	0.1827
Formamide	0.97	-0.28	1.29	76.8769			-	0.48	0.87	0.6	16.1142			0.49	0.71	1.17	1.17
N-Methyl formamide	0.9	0.1	0.89	97.4453			0.96	0.8	0.95	0.65	37.0469			-	0.62	0.76	0.76
N,N-Dimethyl formamide	0.88	0.24	0.74	116.126			0.87	0.69	0.92	0.63	58.5063			0.7	0	0.03	0
N-Methyl acetamide	1.01	0.22	0.77	117.186			0.9	0.8	1.02	0.69	49.397			-	0.47	0.5	0.5
N,N-Dimethyl acetamide	0.88	0.29	0.69	132.845			0.86	0.76	1	0.68	65.2003			0.77	0	0.03	0
N,N-Diethyl acetamide	0.84	0.37	0.61	166.459			0.87	0.78	1.02	0.68	66.1579			0.79	0	0.03	0
2-Pyrrolidinone	0.85	0.22	0.77	120.415			0.91	0.77	1.01	0.68	53.7698			0.73	0.36	0.41	0.41
N-Methyl pyrrolidinone	0.92	0.29	0.69	139.728			0.88	0.77	0.97	0.66	68.6494			0.77	0	0.03	0
Other nitrogen bases					(not enough entries)							(not enough entries)
Tetramethyl urea	0.83	0.37	0.61	162.505			-	0.8	1.06	0.71	71.5199			-	0	0.03	0
Tetramethyl guanidine	0.76	0.39	0.59	166.353			-	0.86	1.71	1.07	79.6181			-	0	0.03	0
Dimethyl cyanamide	0.72	0.2	0.78	118.254			-	0.64	0.76	0.54	42.5523			-	0	0.03	0
Amines					-0.0059	0.9589						(basic functionality)
Butylamine	0.31	0.46	0.52	132.326			0.34	0.72	1.83	1.14	54.3021			-	0	0.03	0
Diaminoethane	0.47	0.15	0.84	107.962			0.52	1.43	1.8	1.12	98.0979			-	0.13	0.03	0
Pyrrolidine	0.39	0.46	0.51	116.226			0.24	0.7	1.78	1.11	50.387			-	0.16	0.03	0
Piperidine	0.3	0.55	0.42	129.158			0.22	1.04	1.73	1.08	40.3176			-	0	0.03	0
Morpholine	0.39	0.3	0.69	123.205			0.45	0.7	1.41	0.91	60.5068			-	0.29	0.03	0
Diethylamine	0.24	0.58	0.39	133.749			0.22	0.7	1.7	1.07	39.1129			-	0.03	0.03	0
Triethylamine	0.14	0.77	0.19	161.612			0.18	0.71	2.26	1.38	40.5126			-	0	0.03	0
Tributylamine	0.16	0.88	0.07	281.351			0.78	0.62	2.3	1.4	40.2037			-	0	0.03	0
Dimethylcyclohexylamine	0.23	0.76	0.2	178.5			0.29	0.84	1.28	0.83	29.5104			-	0	0.03	0
Dimethylbenzylamine	0.45	0.61	0.35	188.855			0.51	0.64	0.83	0.58	18.4225			-	0	0.03	0
Aniline	0.73	-0.05	1.05	134.892			0.89	0.5	0.49	0.39	-4.2326			-	0.26	0.03	0
N-Methylaniline	0.82	0.2	0.79	153.939			0.74	0.47	0.13	0.19	-0.8886			-	0.17	0.03	0
N,N-Dimethylaniline	0.73	0.51	0.46	169.669			0.5	0.43	-0.08	0.07	7.9055			-	0	0.03	0
o-Chloroaniline	0.83	0.02	0.98	152.334			0.91	0.4	0.31	0.28	-16.4534			-	0.25	0.13	0.13
Acid anhydrides					(not enough entries)							(not enough entries)
Acetic anhydride	0.76	0.17	0.82	138.465			-	0.29	0.3	0.28	29.8587			-	0	0.03	0
Aromatic hydrocarbons					8e-05	-0.164						-0.007	-0.0545
Benzene	0.59	0.53	0.45	121.372			0.6	0.1	-0.12	0.05	-0.5064			0.1	0	0.03	0
Toluene	0.54	0.6	0.36	140.922			0.52	0.11	-0.12	0.05	1.3065			0.11	0	0.03	0
m-Xylene	0.47	0.66	0.31	159.729			0.46	0.12	-0.12	0.05	2.8444			0.12	0	0.03	0
p-Xylene	0.43	0.66	0.3	159.325			0.46	0.12	-0.12	0.05	2.7465			0.12	0	0.03	0
Mesitylene	0.41	0.71	0.26	178.731			0.41	0.13	-0.12	0.05	4.1582			0.13	0	0.03	0
Esters and carbonates					-0.0028	0.4322						-0.0003	-0.0058
Dimethyl carbonate	0.55	0.22	0.76	124.273			0.68	0.32	0.37	0.32	31.0622			0.33	0	0.03	0
Diethyl carbonate	0.45	0.4	0.58	165.045			0.61	0.4	0.4	0.34	37.4984			0.36	0	0.03	0
Propylene carbonate	0.83	0.02	0.98	128.174			0.9	0.4	0.39	0.33	28.8439			0.35	0	0.03	0
Ethylene carbonate	0.99	-0.19	1.2	109.379			1.07	0.32	0.35	0.31	23.1418			0.32	0	0.03	0
Ethyl benzoate	0.74	0.47	0.5	191.643			0.61	0.41	0.38	0.33	23.4713			0.34	0	0.03	0
Dimethyl phthalate	0.82	0.27	0.72	220.389			0.9	0.78	0.34	0.3	36.7763			0.32	0	0.03	0
Methyl formate	0.62	0.13	0.86	93.1435			0.69	0.37	0.42	0.35	23.4386			0.36	0	0.03	0
Ethyl formate	0.61	0.26	0.73	113.356			0.61	0.36	0.44	0.36	26.8986			0.38	0	0.03	0
Methyl acetate	0.6	0.28	0.7	113.421			0.59	0.42	0.51	0.4	32.8928			0.42	0	0.03	0
Ethyl acetate	0.55	0.38	0.6	133.451			0.54	0.45	0.53	0.41	36.1775			0.43	0	0.03	0
Butyl acetate	0.46	0.49	0.48	173.609			0.54	0.45	0.52	0.4	36.4924			0.42	0	0.03	0
4-Butyrolactone	0.87	0.14	0.85	116.947			0.74	0.49	0.54	0.42	40.3329			0.43	0	0.03	0
Ethyl chloroacetate	0.7	0.2	0.79	153.124			0.79	0.35	0.35	0.31	16.2007			0.32	0	0.03	0
Ethyl trichloroacetate	0.61	0.55	0.42	182.822			0.5	0.25	0.06	0.15	8.2212			0.16	0	0.03	0
Acyclic ethers					-0.0029	0.4705						0.0032	-0.0599
Diethyl ether	0.27	0.63	0.34	130.48			0.25	0.47	0.76	0.54	29.982			0.51	0	0.03	0
Di-n-propyl ether	0.27	0.77	0.19	170.435			0.21	0.46	0.7	0.5	30.3101			0.47	0	0.03	0
Di-i-propyl ether	0.27	0.68	0.28	163.658			0.29	0.49	0.89	0.61	31.215			0.57	0	0.03	0
Di-n-butyl ether	0.27	0.81	0.15	209.632			0.29	0.46	0.74	0.53	30.7507			0.49	0	0.03	0
Di-(2-chloroethyl) ether	0.82	0.18	0.81	168.306			0.83	0.4	0.29	0.27	14.0703			0.29	0	0.03	0
Dimethoxyethane	0.53	0.4	0.58	142.206			0.52	0.41	0.78	0.55	57.1695			0.43	0	0.03	0
bis-(2-Methoxyethyl) ether	0.64	0.37	0.61	195.78			0.7	0.4	0.81	0.57	83.9688			0.36	0	0.03	0
Dibenzyl ether	0.8	0.46	0.52	246.412			0.76	0.41	0.5	0.39	21.308			0.39	0	0.03	0
Diphenyl ether	0.66	0.49	0.48	211.893			0.63	0.13	-0.07	0.07	-2.044			0.14	0	0.03	0
Cyclic ethers					-0.0023	0.2428						0.0064	-0.1946
Tetrahydrofuran	0.58	0.47	0.51	112.003			0.52	0.55	0.91	0.62	37.7849			0.58	0	0.03	0
2-Methyltetrahydrofuran	0.53	0.54	0.43	131.202			0.49	0.58	0.93	0.63	37.8762			0.59	0	0.03	0
Tetrahydropyran	0.51	0.56	0.42	126.592			0.46	0.54	0.83	0.58	33.3112			0.56	0	0.03	0
Eucalyptol	0.36	0.69	0.28	192.443			0.47	0.61	0.93	0.63	35.5631			0.6	0	0.03	0
1,3-Dioxane	0.55	0.28	0.71	120.411			0.74	0.37	0.7	0.5	48.4486			0.39	0	0.03	0
1,3-Dioxolane	0.69	0.25	0.73	104.884			0.73	0.45	0.59	0.44	39.621			0.38	0	0.03	0
Anisole	0.73	0.43	0.55	150.516			0.65	0.32	0.1	0.17	8.2391			0.31	0	0.03	0
Phenetole	0.69	0.51	0.46	170.978			0.62	0.3	0.12	0.18	9.9684			0.31	0	0.03	0
Halogenated alcohols					(unreliable virtual equilibrium)							(not enough entries)
2-Chloroethanol	0.46	-0.05	1.05	106.739			-	0.53	0.7	0.5	11.4987			-	1.28	0.45	0.45
Trifluoroethanol	0.73	-0.46	1.48	107.932			-	0	0.58	0.44	-23.0148			-	1.51	1.3	1.3
Hexafluoroisopropanol	0.65	-1	2.05	142.673			-	0	0.46	0.37	-67.7277			-	1.96	1.96	1.96
Aliphatic halogenated hydrocarbons					-0.0055	0.7154						-0.005	-0.049
1-Chlorobutane	0.39	0.64	0.33	138.018			0.37	0	-0.12	0.05	4.1547			0.12	0	0.03	0
Dichloromethane	0.82	0.03	0.96	98.4651			0.79	0.1	-0.08	0.07	-15.377			0.04	0.13	0.03	0
1,1-Dichloroethane	0.48	0.31	0.67	116.416			0.6	0.1	-0.09	0.06	-8.257			0.07	0.1	0.03	0
1,2-Dichloroethane	0.81	0.17	0.82	117.019			0.75	0.1	-0.12	0.05	-8.8744			0.05	0	0.03	0
Chloroform	0.58	0.07	0.93	117.563			0.86	0.1	0	0.11	-20.6514			0.06	0.2	0.03	0
1,1,1-Trichloroethane	0.49	0.62	0.35	133.037			0.37	0	-0.14	0.04	-6.4722			0.05	0	0.03	0
Carbon tetrachloride	0.28	0.89	0.06	134.221			0.08	0.1	-0.16	0.02	-2.9462			0.06	0	0.03	0
1,1,2,2-Tetrachloroethane	0.95	0.02	0.98	150.24			1.09	0	-0.02	0.1	-32.0349			-0.01	0	0.03	0
1-Bromobutane	0.5	0.63	0.33	142.758			0.4	0.13	-0.12	0.05	3.9619			0.12	0	0.03	0
Dibromomethane	0.92	0.11	0.88	108.973			0.76	0	-0.06	0.08	-14.9004			0.05	0	0.03	0
1,2-Dibromoethane	0.75	0.25	0.74	127.937			0.73	0	-0.1	0.06	-9.3186			0.06	0	0.03	0
Bromoform	0.62	0.19	0.79	132.47			0.81	0.05	0.02	0.13	-19.5323			0.08	0.05	0.03	0
Iodobutane	0.47	0.64	0.33	150.699			0.44	0.23	-0.12	0.05	2.7268			0.11	0	0.03	0
Diiodomethane	0.65	0.24	0.74	125.288			0.72	0	-0.05	0.08	-13.9384			0.06	0	0.03	0
Olefinic halogenated hydrocarbons					-0.0128	1.6381						-0.008	-0.0455
trans-Dichloroethylene	0.44	0.33	0.65	113.375			0.46	0	-0.08	0.07	-13.6177			0.01	0	0.03	0
Trichloroethylene	0.53	0.54	0.44	130.941			0.47	0.05	-0.07	0.08	-10.0127			0.04	0	0.03	0
Tetrachloroethylene	0.28	0.9	0.05	147.479			0.3	0.05	-0.16	0.02	-2.2334			0.05	0	0.03	0
Aromatic halogenated hydrocarbons					-0.0036	0.2222						-0.0094	-0.081
Fluorobenzene	0.62	0.49	0.48	129.279			-	0.07	-0.12	0.05	-5.4559			-	0	0.03	0
p-Difluorobenzene	0.58	0.43	0.55	136.687			-	0.03	-0.11	0.05	-10.0236			-	0	0.03	0
Hexafluorobenzene	0.33	0.77	0.19	162.881			-	0.02	-0.15	0.03	-5.0417			-	0	0.03	0
Chlorobenzene	0.71	0.52	0.46	141.007			0.74	0.07	-0.13	0.04	-6.8113			0.06	0	0.03	0
o-Dichlorobenzene	0.8	0.55	0.42	157.737			0.77	0.03	-0.12	0.04	-8.7815			0.04	0	0.03	0
m-Dichlorobenzene	0.75	0.53	0.44	160.431			0.79	0.03	-0.12	0.05	-11.126			0.02	0	0.03	0
Bromobenzene	0.79	0.52	0.46	145.831			0.76	0.06	-0.12	0.05	-6.9011			0.06	0	0.03	0
Iodobenzene	0.81	0.51	0.46	154.298			0.8	0.06	-0.12	0.05	-7.2979			0.06	0	0.03	0
Acyclic ketones					-0.0027	0.2697						0.0054	-0.1883
Acetone	0.71	0.27	0.71	102.652			0.72	0.43	0.65	0.48	35.8209			0.47	0.08	0.03	0
2-Butanone	0.67	0.36	0.62	120.79			0.68	0.48	0.64	0.47	35.0255			0.47	0.06	0.03	0
2-Pentanone	0.65	0.42	0.56	140.78			0.67	0.5	0.65	0.48	35.6618			0.47	0.05	0.03	0
3-Pentanone	0.72	0.45	0.53	139.71			0.64	0.45	0.63	0.47	34.0597			0.47	0	0.03	0
Methyl i-butyl ketone	0.65	0.48	0.5	156.853			0.65	0.48	0.61	0.46	32.8993			0.47	0.02	0.03	0
2-Heptanone	0.61	0.5	0.47	180.723			0.69	0.48	0.63	0.47	36.03			0.46	0.05	0.03	0
Cyclic ketones					-0.0037	0.3277						0.0028	-0.1572
Cyclopentanone	0.76	0.35	0.63	124.482			0.76	0.52	0.64	0.47	37.569			0.52	0	0.03	0
Cyclohexanone	0.76	0.41	0.57	138.495			0.75	0.53	0.66	0.49	40.6494			0.53	0	0.03	0
Acetophenone	0.9	0.35	0.63	161.549			0.9	0.49	0.51	0.4	24.3916			0.49	0.04	0.03	0
Nitriles					-0.0061	0.768						0.0031	-0.0675
Acetonitrile	0.75	0.01	0.99	82.8287			0.73	0.4	0.54	0.41	17.9558			0.43	0.19	0.03	0
Propanitrile	0.71	0.19	0.8	102.488			0.65	0.39	0.53	0.41	21.7664			0.41	0	0.03	0
Butanitrile	0.71	0.29	0.69	122.529			0.67	0.4	0.52	0.4	23.1532			0.4	0	0.03	0
Chloroacetonitrile	1.01	-0.28	1.29	103.427			1.15	0.34	0.24	0.25	-13.5851			0.36	0	0.03	0
Benzyl cyanide	1	0.17	0.82	164.701			1.06	0.41	0.37	0.32	10.2355			0.36	0	0.03	0
Benzonitrile	0.9	0.28	0.7	145.811			0.82	0.37	0.38	0.33	11.2495			0.36	0	0.03	0
Nitrohydrocarbons					(not enough entries)							(not enough entries)
Nitromethane	0.85	-0.31	1.32	88.3625			-	0.06	0.05	0.14	2.4811			-	0.22	0.03	0
Nitrobenzene	1.01	0.29	0.7	149.39			-	0.3	0.1	0.17	6.3629			-	0	0.03	0
Perfluorocarbons					(perfluorination)							(perfluorination)
Perfluoro-n-hexane	-0.41	1.07	-0.12	227.04			-	-0.08	-0.21	0	-2.3848			-	0	0.03	0
Perfluoromethylcyclohexane	-0.4	1.07	-0.12	217.466			-	-0.06	-0.21	0	-1.6552			-	0	0.03	0
Perfluorodecalin	-0.32	1.07	-0.12	261.502			-	-0.05	-0.21	0	-1.3309			-	0	0.03	0
Pyridines					-0.0028	0.1134						0.0014	0.0496
Pyridine	0.87	0.31	0.67	117.188			0.89	0.64	1.18	0.77	29.4564			0.68	0	0.03	0
4-Methylpyridine	0.84	0.39	0.59	136.411			0.86	0.67	1.24	0.81	35.0465			0.71	0	0.03	0
2-Fluoropyridine	0.84	0.3	0.68	124.637			-	0.51	0.72	0.52	12.7599			-	0	0.03	0
Perfluoropyridine	0.53	0.6	0.37	152.911			-	0.16	-0.02	0.1	-4.2572			-	0	0.03	0
3,4-Lutidine	0.73	0.43	0.54	152.911			0.86	0.78	1.26	0.82	-4.2572			0.78	0	0.03	0
2,6-Lutidine	0.8	0.5	0.47	152.673			0.78	0.76	1.19	0.78	38.0465			0.68	0	0.03	0
2-Cyanopyridine	1.2	0.16	0.83	142.301			1.11	0.29	0.6	0.45	20.9264			0.37	0	0.03	0
Quinoline	0.92	0.37	0.6	164.746			0.95	0.64	1.05	0.7	24.3278			0.62	0	0.03	0
Organosilanes					(not enough entries)							(not enough entries)
Tetramethylsilane	-0.09	0.93	0.02	150.704			-	0.02	-0.18	0.01	1.2412			-	0	0.03	0
Acyclic sulphides					-0.0005	-0.0181						-0.0027	-0.111
Dimethyl sulphide	0.57	0.48	0.5	103.883			0.57	0.34	0.19	0.22	13.5031			0.37	0	0.03	0
Diethyl sulphide	0.46	0.61	0.35	141.823			0.44	0.37	0.22	0.24	17.4641			0.39	0	0.03	0
Diisopropyl sulphide	0.36	0.68	0.29	172.753			0.39	0.38	0.2	0.22	17.6924			0.38	0	0.03	0
Dibutyl sulphide	0.36	0.74	0.22	216.944			0.34	0.38	0.11	0.17	15.3557			0.32	0	0.03	0
Miscellaneous sulphur-based solvents					(not enough entries)							(not enough entries)
Carbon disulphide	0.61	0.99	-0.04	99.5124			-	0.07	-0.13	0.04	-0.3993			-	0	0.03	0
Dimethyl sulphoxide	1	0.15	0.84	111.901			-	0.76	1.2	0.79	83.1542			-	0	0.03	0
Sulpholane	0.98	0.07	0.92	139.78			-	0.39	0.52	0.41	55.5485			-	0	0.03	0
Tetrahydrothiophene	0.62	0.53	0.44	123.953			-	0.44	0.21	0.23	17.5814			-	0	0.03	0
Thiane	0.61	0.6	0.37	138.003			-	0.36	0.17	0.21	16.0899			-	0	0.03	0
Dimethyl sulphate	0.78	0.06	0.94	138.965			-	0.36	-0.03	0.1	12.2423			-	0	0.03	0
Aqueous					(not enough entries)							(not enough entries)
Water	1.09	-0.9	1.94	43.0704			-	0.47	0.87	0.6	12.6583			-	1.17	1.49	1.49
Organophosphates					-0.0016	0.2775						(not enough entries)
Trimethyl phosphate	0.72	0.21	0.78	165.02			0.77	0.77	0.65	0.48	55.3138			-	0	0.03	0
Triethyl phosphate	0.72	0.37	0.61	216.432			0.68	0.77	0.69	0.5	66.3371			-	0	0.03	0
Tributyl phosphate	0.65	0.55	0.42	337.41			0.68	0.8	0.7	0.51	68.1683			-	0	0.03	0
Phosphoramides					(not enough entries)							(not enough entries)
Hexamethyl phosphoramide	0.87	0.36	0.62	211.374			-	1.05	1.25	0.81	103.518			-	0	0.03	0
Secondary data set
p-Cymene	0.39	0.72	0.24	194.324	8e-05	-0.164	0.39	0.13	-0.13	0.04	3.2613	-0.007	-0.0545	0.12	0	0.03	0
Propane-1,3-diol	0.84	0.21	0.78	114.049	-0.0043	0.5375	0.73	0.77	0.98	0.66	37.7533	-0.0026	0.0543	0.71	0.8	1.06	1.06
1,2-Propanediol	0.76	0.15	0.84	116.236	-0.0043	0.5375	0.8	0.78	0.91	0.63	31.026	-0.0026	0.0543	0.65	0.83	0.89	0.89
Dihydrolevoglucosenone	0.93	0.11	0.88	144.921	-0.0037	0.3277	1.09	0.61	0.4	0.34	42.0298	0.0028	-0.1572	0.38	0	0.03	0
Dimethyl isosorbide	0.84	0.3	0.68	198.808	-0.0029	0.4705	0.79	0.43	0.65	0.48	69.3368	0.0032	-0.0599	0.31	0	0.03	0
Cygnet 0.0*	1.09	0	0.99	181.887	-0.0023	0.2428	1.17	0.17	0.4	0.34	68.7386	0.0064	-0.1946	0.09	0	0.03	0
2,2,5,5-Tetramethyloxolane	0.35	0.66	0.3	176.829	-0.0023	0.2428	0.47	0.77	0.99	0.67	35.3469	0.0064	-0.1946	0.64	0	0.03	0
Dimethyl glutarate	0.85	0.27	0.71	206.495	-0.0028	0.4322	0.86	0.52	0.44	0.36	59.0594	-0.0003	-0.0058	0.38	0	0.03	0
γ-Valerolactone	0.83	0.21	0.77	135.802	-0.0028	0.4322	0.72	0.6	0.55	0.42	43.3565	-0.0003	-0.0058	0.44	0	0.03	0
Methyl t-butyl ether	0.25	0.62	0.35	140.318	-0.0029	0.4705	0.29	0.45	0.86	0.59	32.2047	0.0032	-0.0599	0.55	0	0.03	0
Cyclopentyl methyl ether	0.41	0.66	0.31	148.457	-0.0029	0.4705	0.27	0.49	0.73	0.52	27.7925	0.0032	-0.0599	0.5	0	0.03	0
Limonene	0.16	0.78	0.18	196.489	-0.0007	0.0854	0.23	0	-0.12	0.05	7.9349	0.0095	0.0045	-0.03	0	0.03	0
Ethyl lactate	0.82	0.33	0.65	159.457	-0.0043	0.5375	0.8	0.52	0.7	0.51	40.7985	-0.0026	0.0543	0.56	0.69	0.03	0
Solketal	0.86	0.27	0.71	165.849	-0.0043	0.5375	0.89	0.63	0.75	0.53	49.0029	-0.0026	0.0543	0.61	0.59	0.2	0.2
N-Butyl pyrrolidone	0.77	0.41	0.56	197.399	-0.0027	0.1886	0.91	0.92	0.95	0.65	68.5643	-0.0043	0.1827	-	0	0.03	0
Methyl pivalate	0.49	0.52	0.45	162.739	-0.0028	0.4322	0.47	0.45	0.5	0.39	30.4649	-0.0003	-0.0058	0.41	0	0.03	0
Methyl butyrate	0.51	0.44	0.53	151.891	-0.0028	0.4322	0.53	0.48	0.47	0.38	32.6938	-0.0003	-0.0058	0.39	0	0.03	0
Ethyl isobutyrate	0.49	0.52	0.45	169.911	-0.0028	0.4322	0.49	0.48	0.49	0.39	35.0924	-0.0003	-0.0058	0.4	0	0.03	0
Pinacolone	0.59	0.48	0.49	149.744	-0.0027	0.2697	0.63	0.58	0.61	0.46	33.4207	0.0054	-0.1883	0.46	0	0.03	0
Ethylene glycol n-butyl ether	0.69	0.5	0.47	179.291	-0.0043	0.5375	0.71	0.68	0.86	0.59	42.705	-0.0026	0.0543	0.65	0.59	0.13	0.13
Diethylene glycol methyl ether	0.85	0.32	0.67	161.636	-0.0043	0.5375	0.82	0.63	0.86	0.59	69.5656	-0.0026	0.0543	0.72	0.53	0.03	0
α-Pinene	0.11	0.91	0.04	184.464	-0.0007	0.0854	0.08	0	-0.15	0.03	2.2115	0.0095	0.0045	0	0	0.03	0
2-Methoxyethanol	0.71	0.29	0.69	119.788	-0.0043	0.5375	0.67	n/a	0.88	0.61	40.1125	-0.0026	0.0543	0.66	0.9	0.32	0.32
Ionic liquids
[bmim][NTf2]	1.01	-0.01	1.01	-	-	-	-	0.21	0.28	0.27	-	-	-	-	0.6	-	-
[bmmim][NTf2]	1.03	0.09	0.91	-	-	-	-	0.28	0.25	0.26	-	-	-	-	0.38	-	-
[bmPyr][NTf2]	0.97	0.07	0.93	-	-	-	-	0.26	0.27	0.27	-	-	-	-	0.41	-	-
[bmim][OTf]	1.03	0.11	0.88	-	-	-	-	0.51	1.04	0.7	-	-	-	-	0.6	-	-
[bmim][PF6]	1.02	-0.22	1.22	-	-	-	-	0.25	0.13	0.19	-	-	-	-	0.65	-	-
[bmim][BF4]	1.05	-0.1	1.1	-	-	-	-	0.37	0.48	0.39	-	-	-	-	0.63	-	-
[omim][NTf2]	0.96	0.09	0.9	-	-	-	-	0.29	0.28	0.27	-	-	-	-	0.6	-	-
[omim][BF4]	0.98	-0.01	1.01	-	-	-	-	0.41	0.46	0.37	-	-	-	-	0.62	-	-
[bmmim][BF4]	1.08	-0.01	1.01	-	-	-	-	0.36	0.46	0.37	-	-	-	-	0.39	-	-
[emim][NTf2]	1	-0.09	1.09	-	-	-	-	0.23	0.27	0.27	-	-	-	-	0.63	-	-
[emim][C8H17SO3]	0.93	0.1	0.89	-	-	-	-	0.77	0.81	0.57	-	-	-	-	0.65	-	-
[bmim][C8H17SO3]	0.89	0.15	0.84	-	-	-	-	0.79	0.81	0.57	-	-	-	-	0.69	-	-
*Virtual tautomerisations performed at 60 °C to correspond to the temperature at which the KAT parameters were obtained. Cygnet 0.0 is spiro-6,8-dioxabicyclo[3.2.1]octane-4,2'-[1,3]dioxolane].
Results unsuitable for correction are colour-coded as follows:			Acids which do not obey the relationship between methyl acetoacetate tautomerisation and solvent dipolarity.
			Solvents with high β or basicity (e.g. amines) for which the ln(KT) value of dimedone is underestimated.
			Polyfluorinated substrates.
			Water.

## Sheet: Literature case studies
Case study	XYZ = XYZ0 + a·α + b·β + s·π* + m·VM						Pearson correlation coefficient for the relationships between experimental and calculated XYZ (shown).
	XYZ	XYZ0	a	b	s	m	Empirical KAT parameters		Uncorrected KAT parameters		Corrected KAT parameters
1	ln(K)	1.22	0	0	-1.89	0		0.939		0.905		0.953
2	ln(K)	-3.11	0	3.53	0	0		0.92		0.94		0.953
3	ln(KT)	3.25	0	0	-5.03	0		0.964		0.978		0.921
4	ΔG°	-4.59	2.53	0	4.1	0		0.933		0.963		0.92
5	ΔG°	-1.5	-2.9	-5.8	0	0		0.978		0.94		0.943
6	ln(k)	-5.31	0	0	8.21	0		0.867		0.89		0.851
7	log(k)	-4.89	-1.33	0	2.58	0		0.974		0.939		0.966
8	log(k)	-13.89	4.19	0	5.7	0		0.978		0.9		0.944
9	log(k)	-11.43	3.15	0	6.05	0		0.981		0.874		0.912
10	log(k)	-9.95	2.44	0	6.07	0		0.983		0.893		0.911
11	ln(k)	-3.45	0	-7.68	0	0		0.973		0.931		0.984
12	log(initial rate)	-0.18	0	2.44	0	0.0183		0.936		0.937		0.933
13	ln(k)	-10.48	0	-1.2	0	0		0.994		0.979		0.993
14	ln(initial rate)	-13.17	0	0	6.87	0		0.875		0.742		0.854
15	ln(k1/k-1)	3.73	2.97	-2.67	-1.2	0		0.999		0.934		0.984
16	log(er)	0.93	0	0	-0.43	0		0.957		0.941		0.965

## Sheet: Direct equilibrium calculations
Biginelli reaction of methyl acetoacetate at 75 °C (case study 1)			Biginelli reaction of dimedone at 75 °C (case study 2)			3-Benzoyl camphor isomerisation at 0 °C (case study 3)			2-Isopropyl-5-methoxy-1,3-dioxane isomerisation at 25 °C (case study 4)			Chloroacetaldehyde rotation at 36 °C (case study 5)
Solvent	Experimental ln(K')	Virtual ln(K')	Solvent	Experimental ln(K')	Virtual ln(K')	Solvent	Experimental ln(K)	Virtual ln(K)	Solvent	Experimental ΔG° /kJmol-1	Virtual ΔG° /kJmol-1	Solvent	Experimental ΔG° /kJmol-1	Virtual ΔG° /kJmol-1
Acetic acid	-0.6	8.87432	Acetic acid	-1.02	17.2104	Diethyl ether	1.92	9.76	n-Hexane	-4.44	-5.12	Cyclohexane	-1.3	2.02
t-Butanol	0.21	10.6544	t-Butanol	0.02	18.3812	Ethyl acetate	0.68	9.31	Cyclohexane	-4.31	-5.12	Tetrachloromethane	-1.46	1.6
1,2-Dichloroethane	-0.23	6.27916	1,2-Dichloroethane	-3.46	14.0197	Ethanol	0.51	9.43	Tetrachloromethane	-3.77	-4.54	Chloroform	-2.34	-0.23
N,N-Dimethyl formamide	-0.53	10.3439	N,N-Dimethyl formamide	-0.65	17.973	Methanol	-0.14	9.18	Mesitylene	-3.64	-4.14	Benzene	-2.68	0.13
Ethanol	0.25	10.8084	Ethanol	-0.91	18.6792	Acetone	-0.16	9.1	Diethyl ether	-3.47	-4.15	Dichloromethane	-2.97	-0.7
Ethyl acetate	0.03	8.77752	Ethyl acetate	-1.53	16.3316				Toluene	-2.97	-3.77	Acetone	-4.18	-2.18
Ethylene glycol	-0.51	10.516	Ethylene glycol	-0.69	18.6231				Tetrahydrofuran	-2.72	-3.8	Acetonitrile	-4.6	-2.87
Toluene	0.35	6.85299	Toluene	-2.48	14.314				Benzene	-2.47	-3.48	N,N-Dimethyl formamide	-5.23	-2.82
									1,1,1-Trichloroethane	-2.43	-3.53	Dimethyl sulphoxide	-6.07	-3.56
									Acetone	-1.42	-3.18	Formamide	-6.28	-3.59
									Nitrobenzene	-0.84	-2.54
									Trichloromethane	-0.67	0.41
									Dichloromethane	-0.42	-0.77
									Methanol	-0.13	0.49
									Acetonitrile	0.04	-1.95
